# Supplementary material for: Posthemorrhagic Hydrocephalus in Patients with Subarachnoid Hemorrhage Occurs Independently of CSF Osmolality
Source: MDPI journal article supplement (doi:10.3390/ijms241411476), 2023-07-14
Supplement: s1 [file s1]

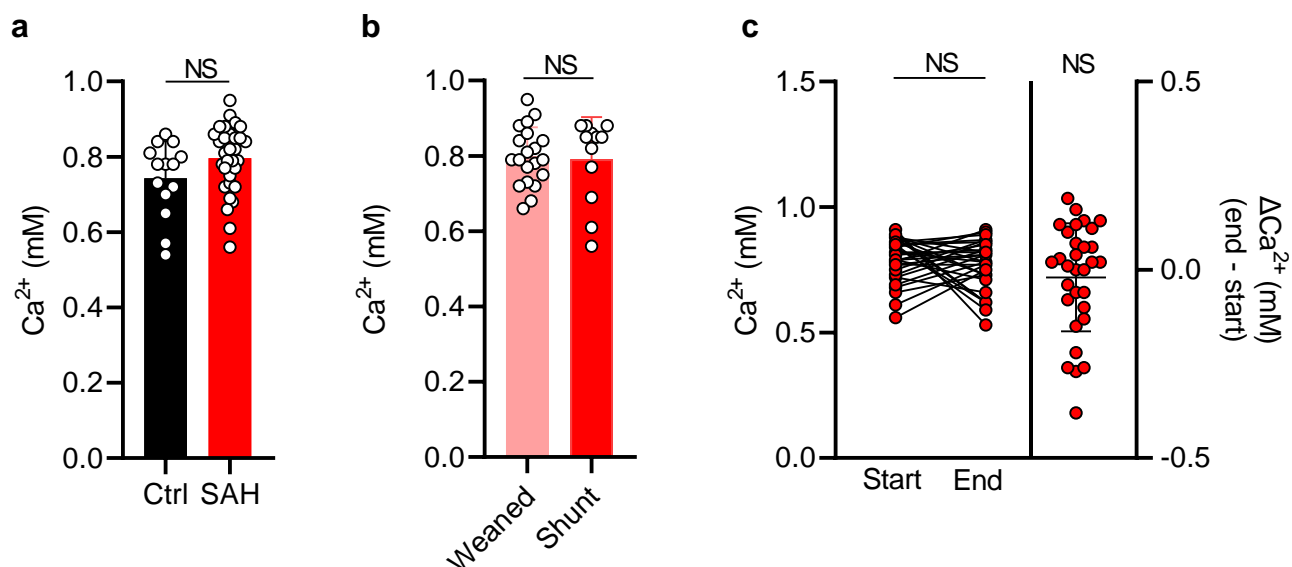

**Figure S1. CSF concentration of  $\text{Ca}^{2+}$ .** (a) Concentration of  $\text{Ca}^{2+}$  in CSF from patients with SAH ( $0.80 \pm 0.09$  mM, n = 32) and healthy control subjects ( $0.74 \pm 1.00$  mM, n = 14, P = 0.08). (b) CSF concentration of  $\text{Ca}^{2+}$  in SAH patients with successful EVD weaning ( $0.80 \pm 0.08$  mM, n = 20) and shunt insertion due to chronic PHH development ( $0.79 \pm 0.11$  mM, n = 12, P = 0.68). (c) CSF concentration of  $\text{Ca}^{2+}$  across the whole SAH patient group divided into start samples ( $0.79 \pm 0.09$  mM, n = 31) and end samples ( $0.77 \pm 0.10$  mM, n = 31, P = 0.79, left panel). The average  $\text{Ca}^{2+}$  change amounted to  $0.02 \pm 0.14$  mM (n = 31, P = 0.89, right panel). Data are presented as mean  $\pm$  standard deviation. For unpaired CSF samples, statistical significance was tested with an unpaired two-tailed t-test or a Mann-Whitney test, depending on normality. A Wilcoxon matched-pairs signed rank test was employed for paired CSF samples. A one-sample Wilcoxon signed rank test was employed to determine the average  $\text{Ca}^{2+}$  change. Ctrl; control, SAH; subarachnoid hemorrhage. NS = not significant.

**a**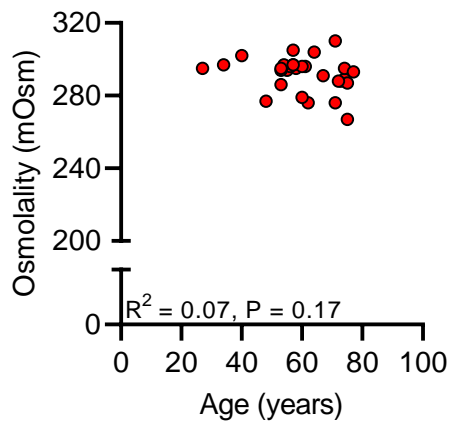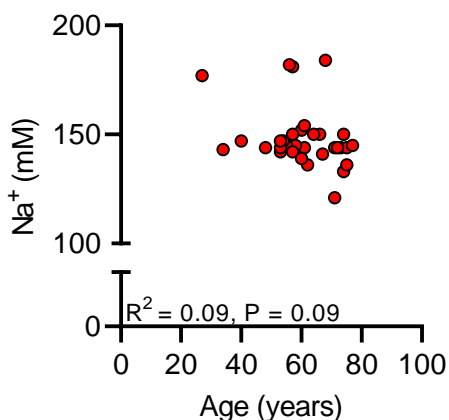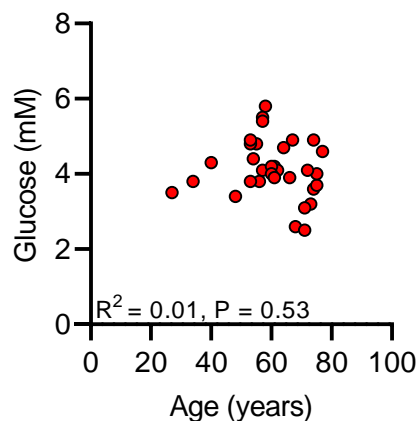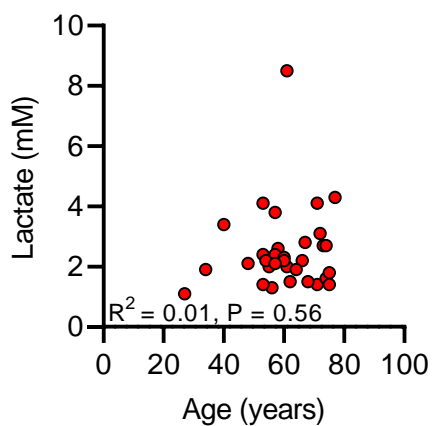**b**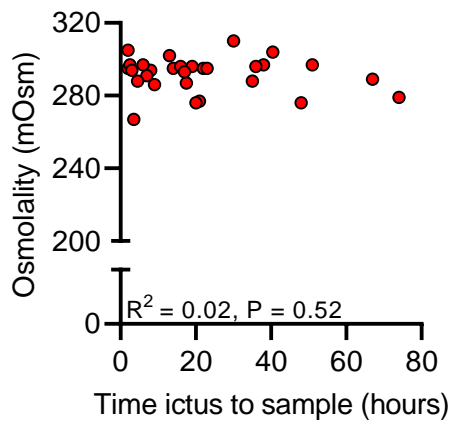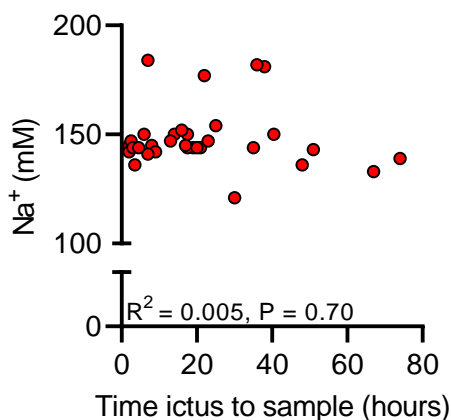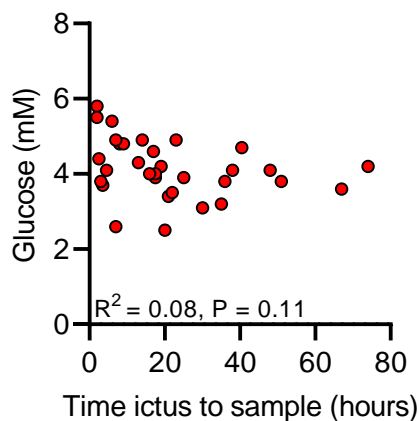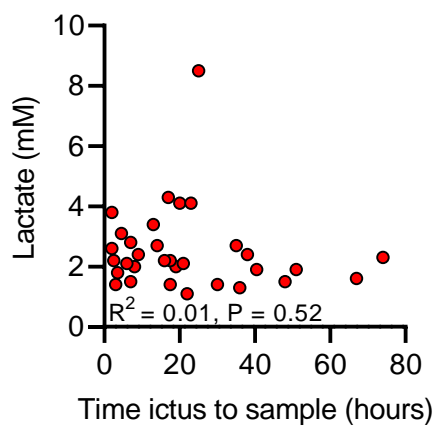**c**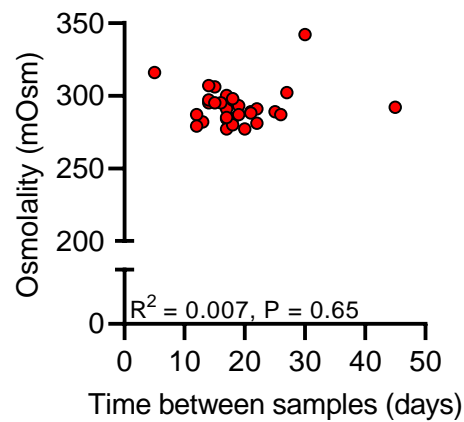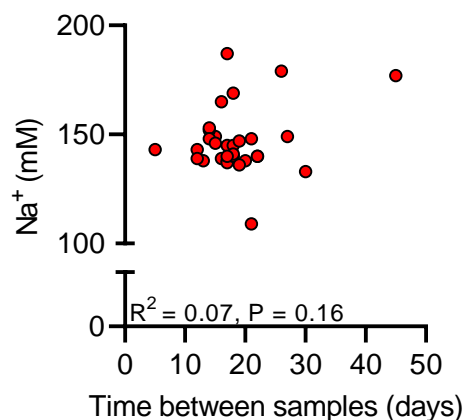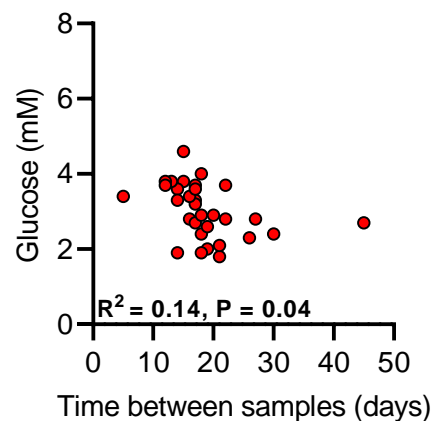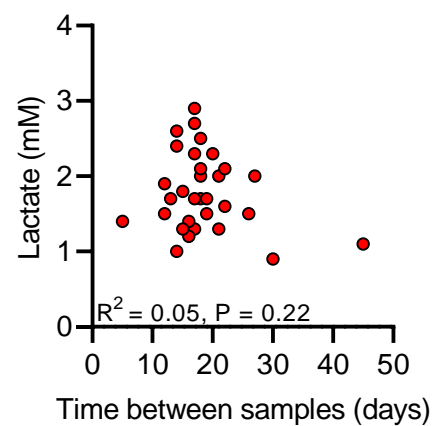

**Figure S2. Correlation analysis.** Correlation between CSF osmolality, Na<sup>+</sup>, glucose, and lactate levels with patient age (**a**), time from ictus to first CSF sample (**b**), and time between the first and second CSF sample (**c**). Start samples were employed for correlation analysis with patient age (**a**) and time from ictus to first CSF sample (**b**), while end samples were employed for correlation analysis of time between the first and second CSF sample (**c**). All SAH patients were included in the analysis (n = 29-32), statistical evaluation with Pearson correlation coefficient. Significant P values are highlighted in bold.

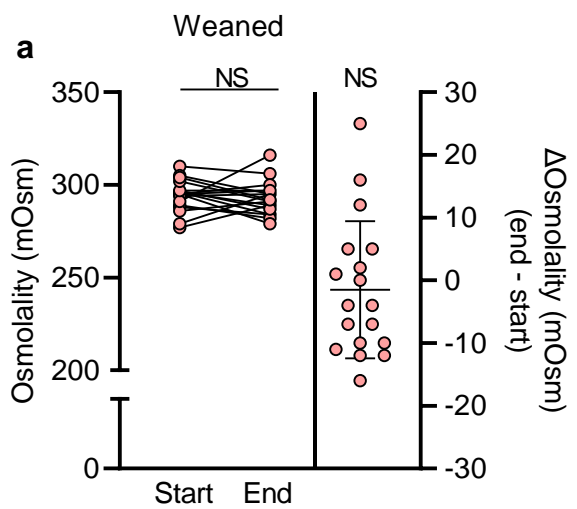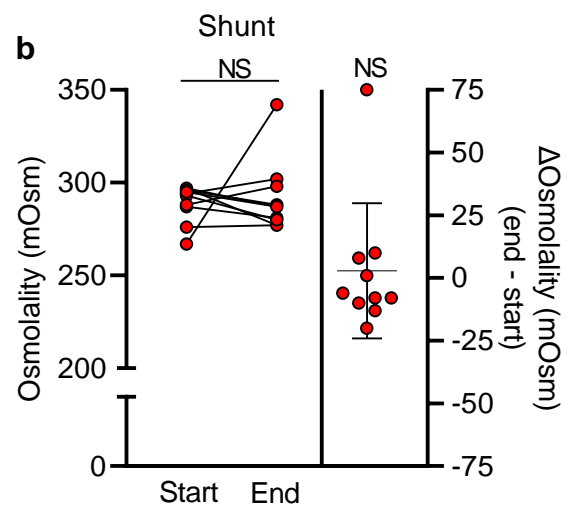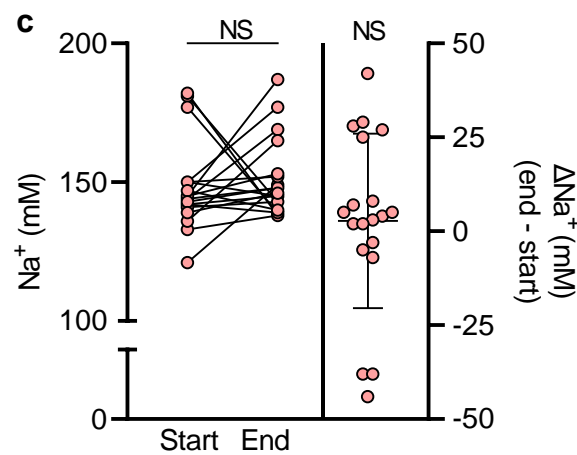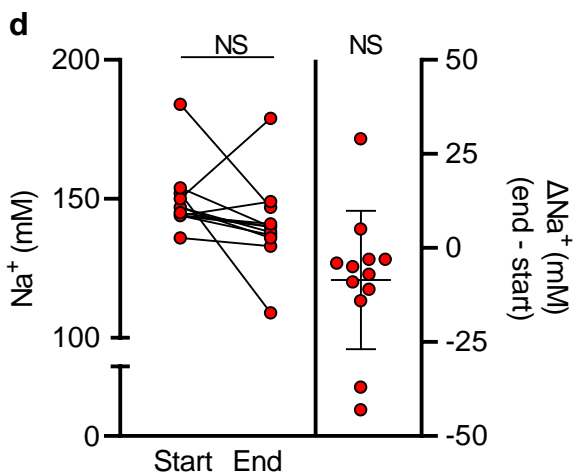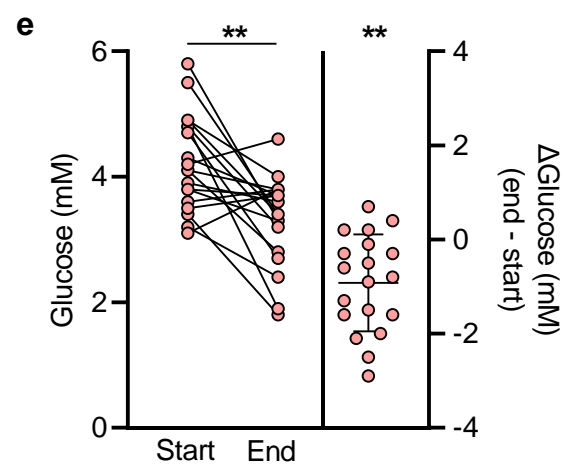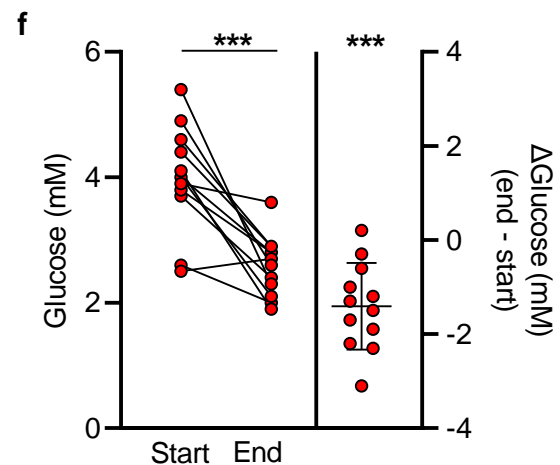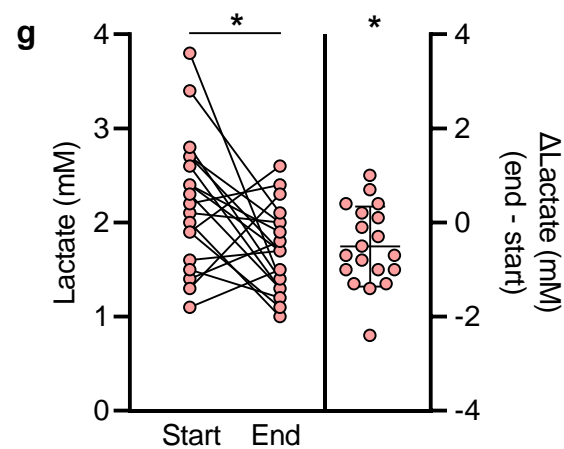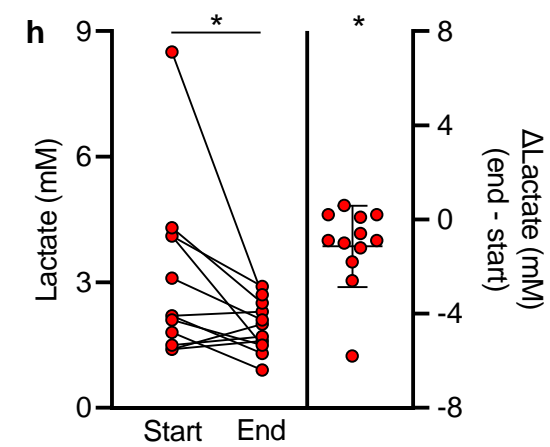

**Figure S3. CSF osmolality, Na<sup>+</sup>, glucose, and lactate content in weaned and shunted SAH patients.**

(a) CSF osmolality (left) in start samples ( $294 \pm 8$  mOsm) and end samples ( $293 \pm 9$  mOsm) collected from weaned SAH patients ( $n = 18$  of each,  $P = 0.57$ ). Average CSF osmolality change is depicted on the right ( $2 \pm 11$  mOsm,  $n = 18$ ,  $P = 0.57$ ). (b) CSF osmolality (left) in start samples ( $289 \pm 10$  mOsm) and end samples ( $292 \pm 20$  mOsm) collected from shunted SAH patients ( $n = 10$  of each,  $P = 0.58$ ). Average CSF osmolality change is depicted on the right ( $3 \pm 27$  mOsm,  $n = 10$ ,  $P = 0.58$ ). (c) CSF Na<sup>+</sup> concentration (left) in start samples ( $148 \pm 16$  mM) and end samples ( $151 \pm 14$  mM) collected from weaned SAH patients ( $n = 19$  of each,  $P = 0.37$ ). Average CSF Na<sup>+</sup> change is depicted on the right ( $3 \pm 23$  mM,  $n = 19$ ,  $P = 0.61$ ). (d) CSF Na<sup>+</sup> concentration (left) in start samples ( $149 \pm 12$  mM) and end samples ( $141 \pm 16$  mM) collected from shunted SAH patients ( $n = 12$  of each,  $P = 0.05$ ). Average CSF Na<sup>+</sup> change is depicted on the right ( $9 \pm 18$  mM,  $n = 12$ ,  $P = 0.14$ ). (e) CSF glucose levels (left) in start samples ( $4.23 \pm 0.76$  mM) and end samples ( $3.31 \pm 0.71$  mM) collected from weaned SAH patients ( $n = 19$  of each,  $P < 0.01$ ). Average CSF glucose decrease is depicted on the right ( $0.92 \pm 1.03$  mM,  $n = 19$ ,  $P < 0.01$ ). (f) CSF glucose levels (left) in start samples ( $3.99 \pm 0.83$  mM) and end samples ( $2.58 \pm 0.48$  mM) collected from shunted SAH patients ( $n = 12$  of each,  $P < 0.001$ ). Average CSF glucose decrease is depicted on the right ( $1.41 \pm 0.92$  mM,  $n = 12$ ,  $P < 0.001$ ). (g) CSF lactate levels (left) in start samples ( $2.22 \pm 0.70$  mM) and end samples ( $1.71 \pm 0.45$  mM) collected from weaned SAH patients ( $n = 19$  of each,  $P < 0.05$ ). Average CSF lactate decrease is depicted on the right ( $0.51 \pm 0.85$  mM,  $n = 19$ ,  $P < 0.05$ ). (h) CSF lactate levels (left) in start samples ( $3.06 \pm 2.03$  mM) and end samples ( $1.92 \pm 0.60$  mM) collected from shunted SAH patients ( $n = 12$  of each,  $P < 0.05$ ). Average CSF lactate decrease is depicted on the right ( $1.14 \pm 1.73$  mM,  $n = 12$ ,  $P < 0.05$ ). Data are presented as mean  $\pm$  standard deviation. For paired CSF samples, statistical significance was tested with a paired two-tailed t-test or a Wilcoxon matched-pairs signed rank test, depending on normality. For determination of average changes, a one-sample two-tailed t-test or a one-sample Wilcoxon signed rank test was conducted, depending on normality. \*  $P < 0.05$ . \*\*  $P < 0.01$ . \*\*\*  $P < 0.001$ . NS = not significant.
